# Supplementary material for: SIGMA leverages protein structural information to predict the pathogenicity of missense variants
Source: PubMed Central journal article supplement — Cell Rep Methods. 2024 Jan 10;4(1):100687. doi: 10.1016/j.crmeth.2023.100687 (PMC10831939; doi:10.1016/j.crmeth.2023.100687), 2024-01-10
Supplement: mmc1.pdf [file mmc1.pdf]

**Cell Reports Methods, Volume 4**

## **Supplemental information**

### **SIGMA leverages protein structural information to predict the pathogenicity of missense variants**

**Hengqiang Zhao, Huakang Du, Sen Zhao, Zefu Chen, Yaqi Li, Kexin Xu, Bowen Liu, Xi Cheng, Wen Wen, Guozhuang Li, Guilin Chen, Zhengye Zhao, Guixing Qiu, Deciphering Disorders Involving Scoliosis & Comorbidities (DISCO) Study, Pengfei Liu, Terry Jianguo Zhang, Zhihong Wu, and Nan Wu**

## Supplemental figures

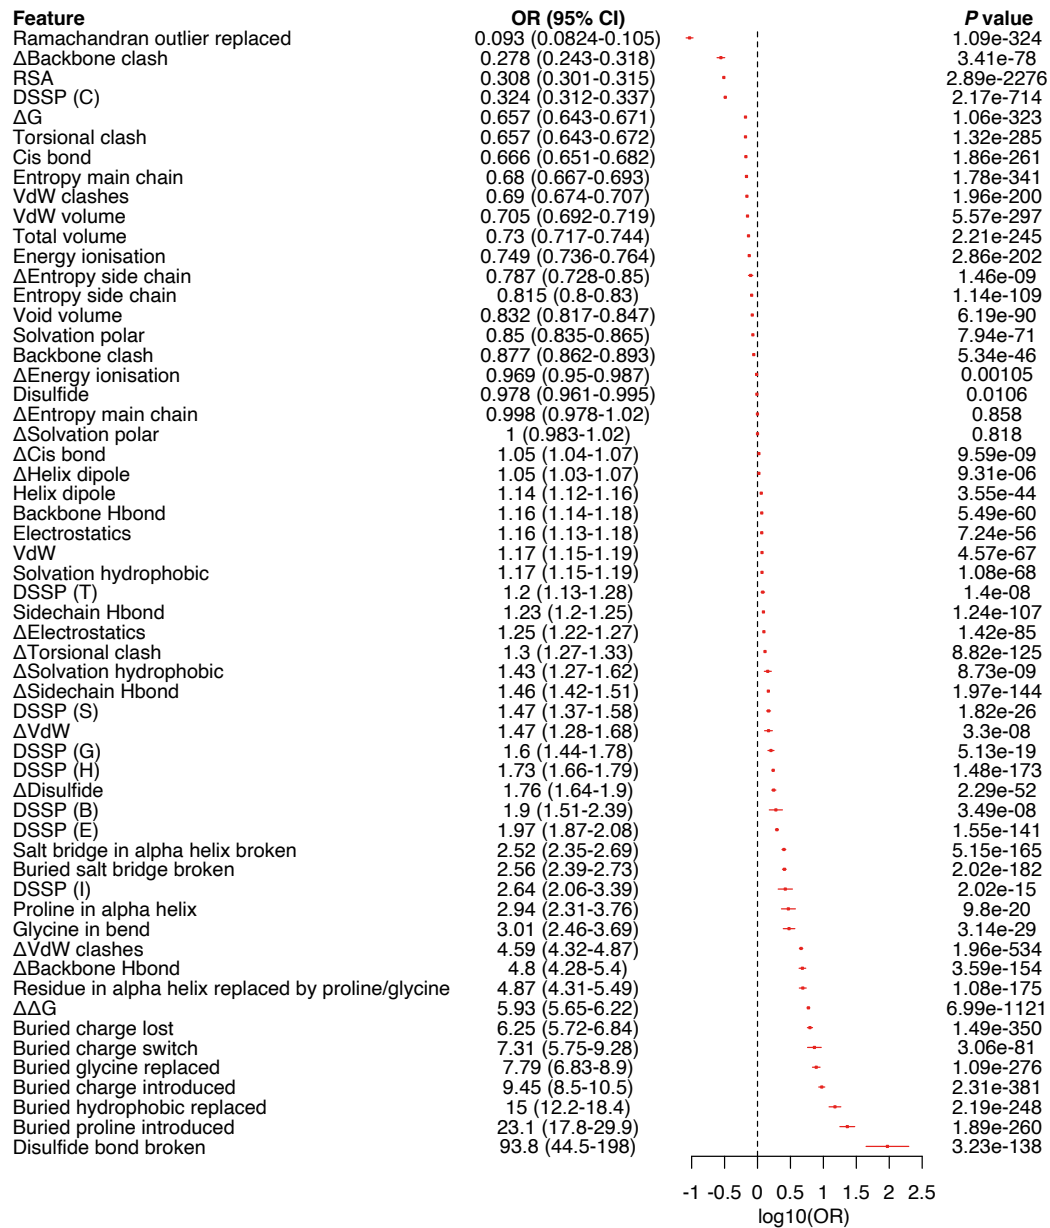

Figure S1: Forest plot for the associations of structure-informed features with variant pathogenicity.

Center values represent OR, and error bars represent the 95% CI for the OR. P values were calculated by using Pearson's chi-squared test. RSA, relative solvent accessibility;  $\Delta\Delta$ G, the unfolding free energy difference between the wild-type and mutant protein;  $\Delta$ G, the unfolding free energy of the wild-type protein; OR, odds ratio; SS-bond, disulfide bond; DSSP codes: C, loop; H, alpha-helix; E, beta-sheet; S, bend; G, 3-helix; I, 5-helix; T, hydrogen-bonded turn; B, residue in isolated beta-bridge; VdW, Van der Waals. Related to Figure 2.

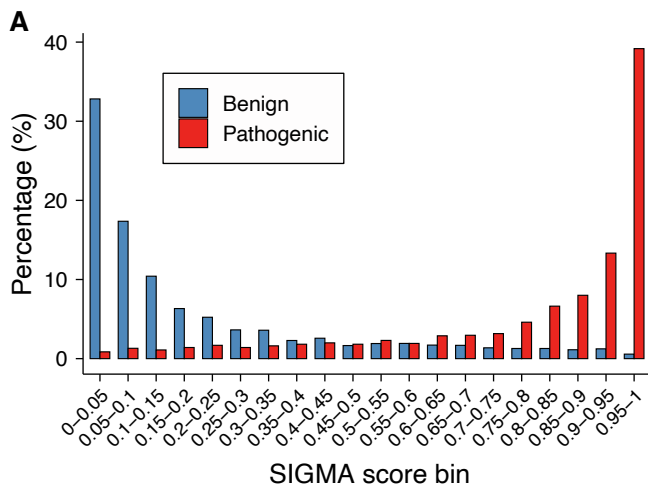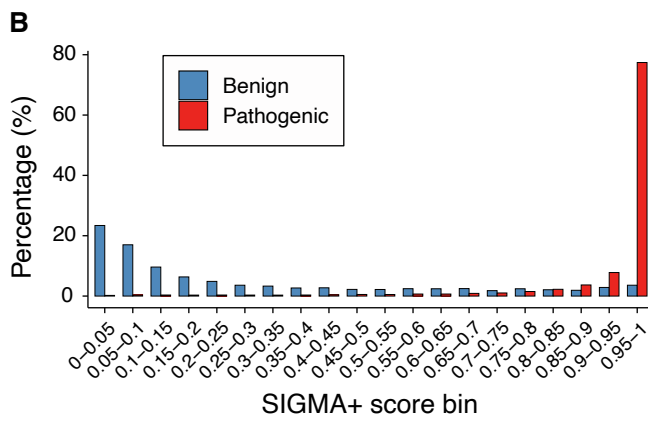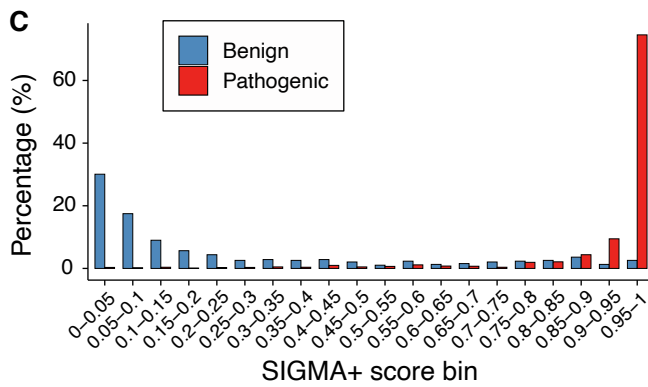

Figure S2: The distribution of SIGMA (SIGMA+) scores for pathogenic (red) and benign (blue) variants. (A) SIGMA scores in the test set. (B) SIGMA+ scores in the training set. (C) SIGMA+ scores in the test set. Related to Figure 3 and Figure 7.

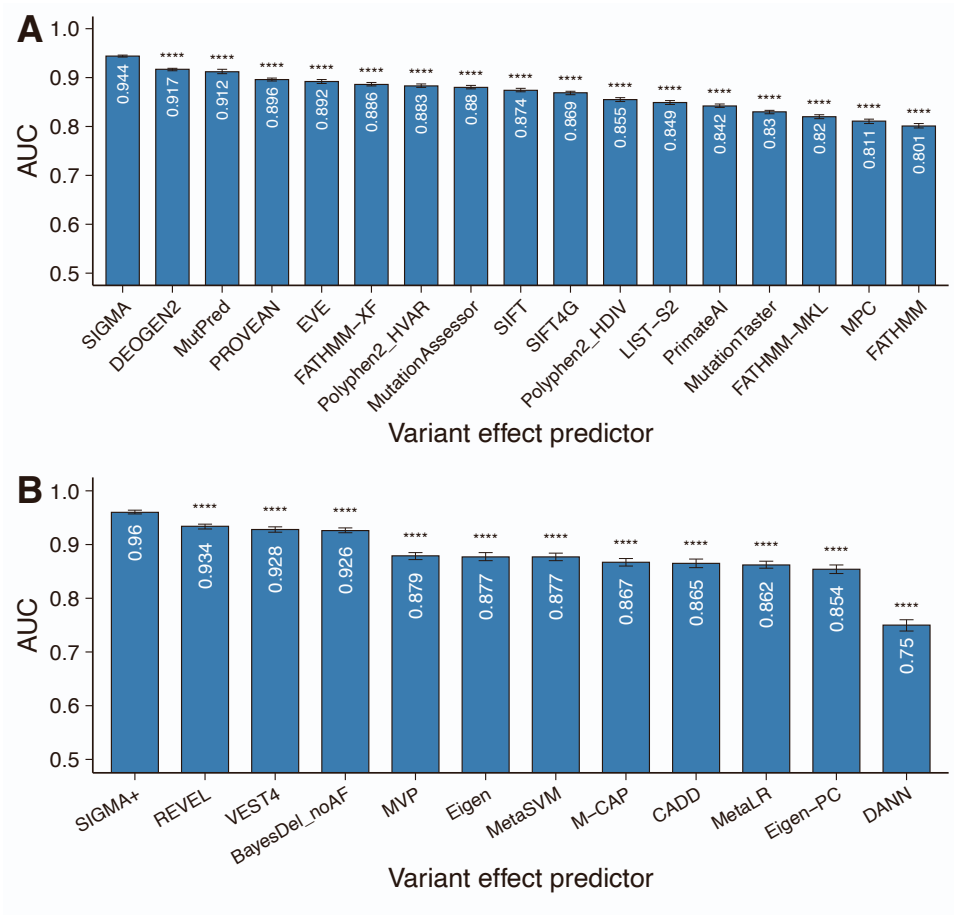

Figure S3: The performance of predictors on the training set. Related to Figure 3.

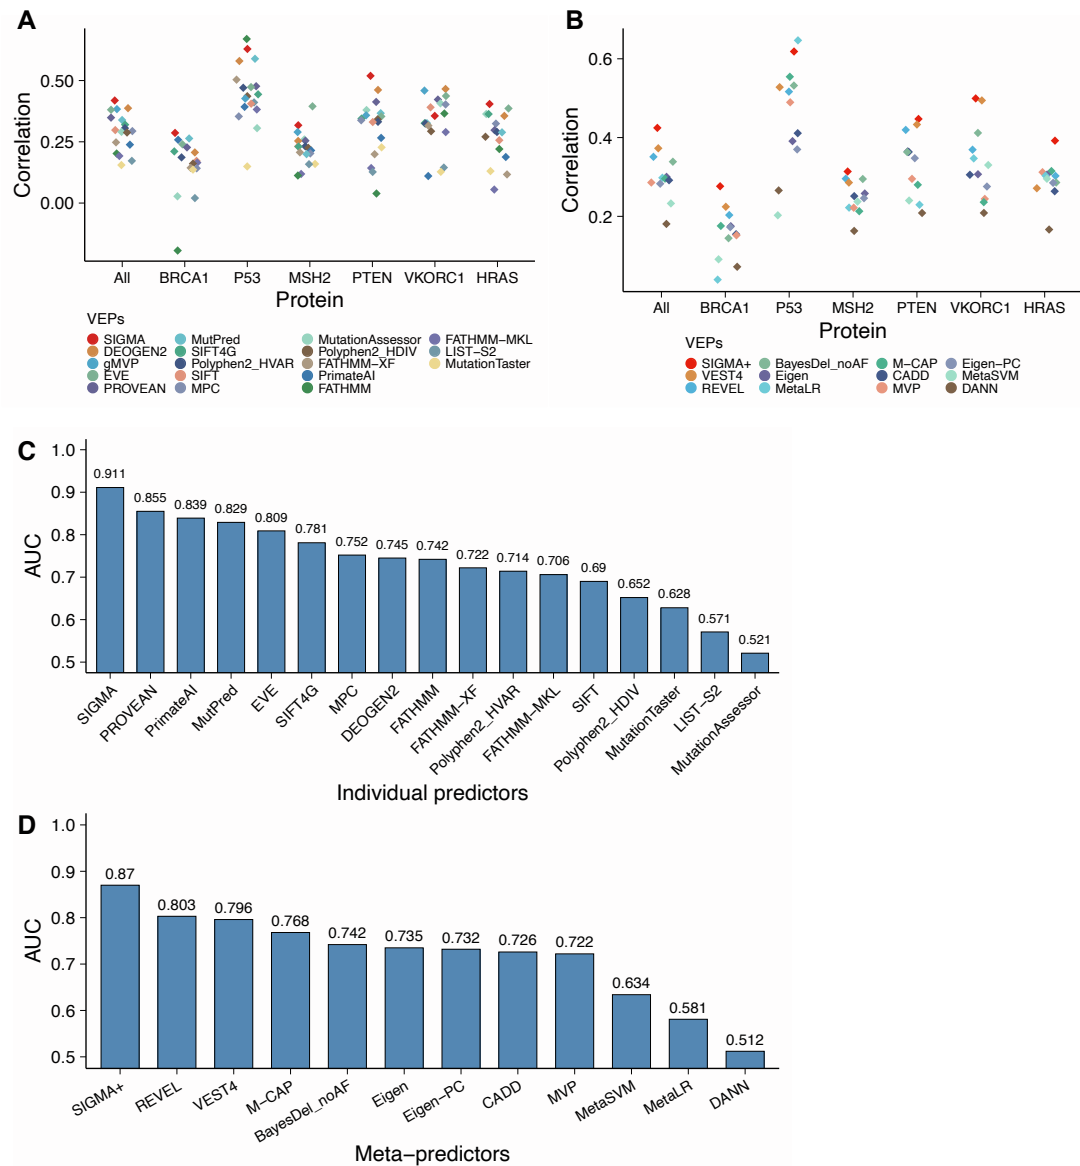

Figure S4: Performance of variant effect predictors on deep mutational scanning (DMS) datasets. (A) Correlation between individual predictors and DMS measurements. (B) Correlation between meta-predictors and DMS measurements. (C) The area under the ROC curves (AUCs) of individual predictors on the BRCA1 DMS dataset. (D) The AUCs of meta-predictors on the BRCA1 DMS dataset. Spearman's correlation was calculated between functional scores from DMS experiments and prediction scores from predictors. Related to Figure 3 and Figure 7.

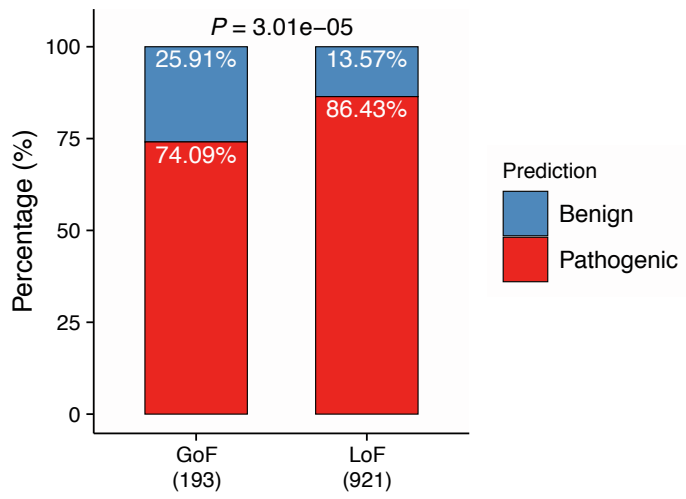

Figure S5: SIGMA predictions for 193 GoF variants and 921 LoF variants. Related to Figure 5.

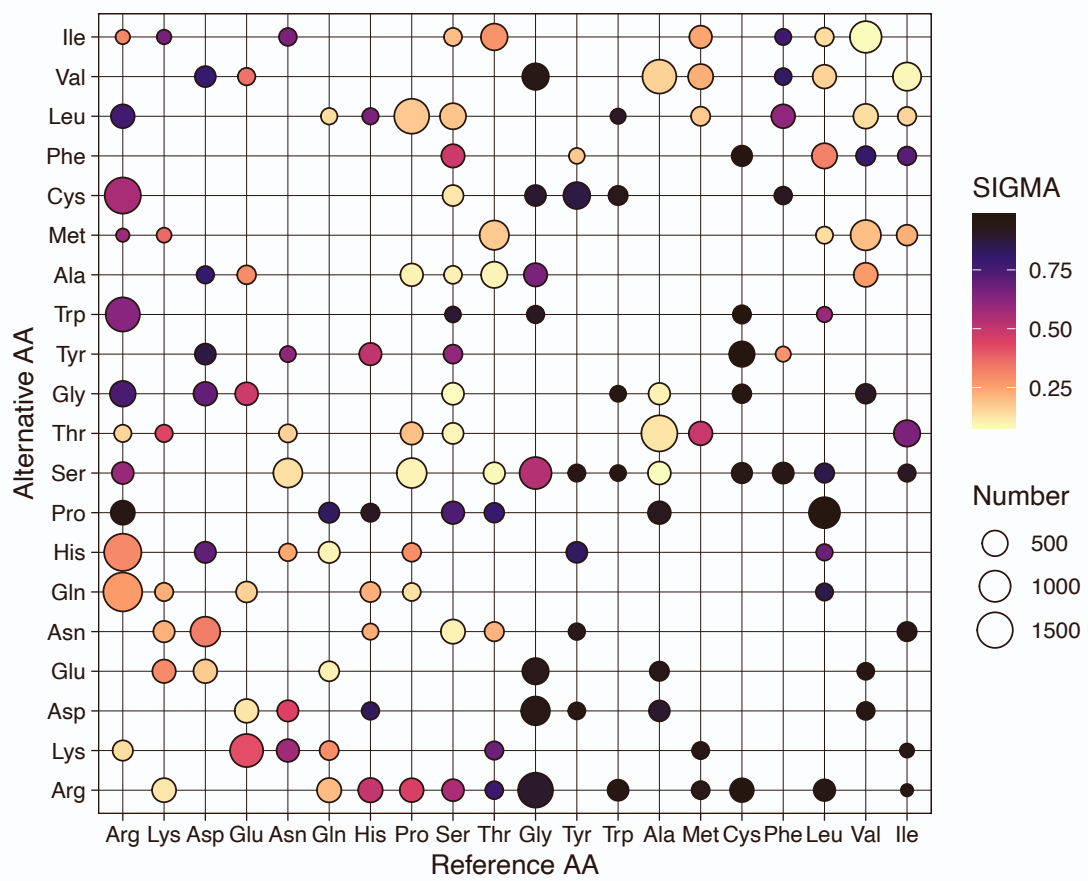

Figure S6: Pathogenicity matrix for each type of amino acid substitution in the labeled dataset. Related to Figure 6.

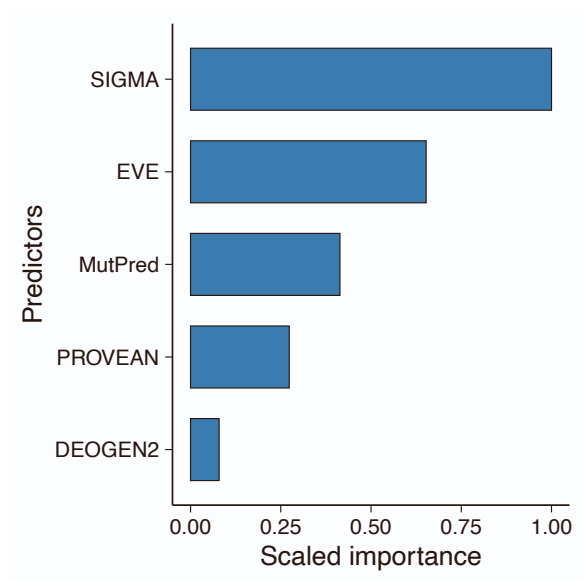

Figure S7: The importance of five predictors that contributed to SIGMA+. Related to Figure 7.



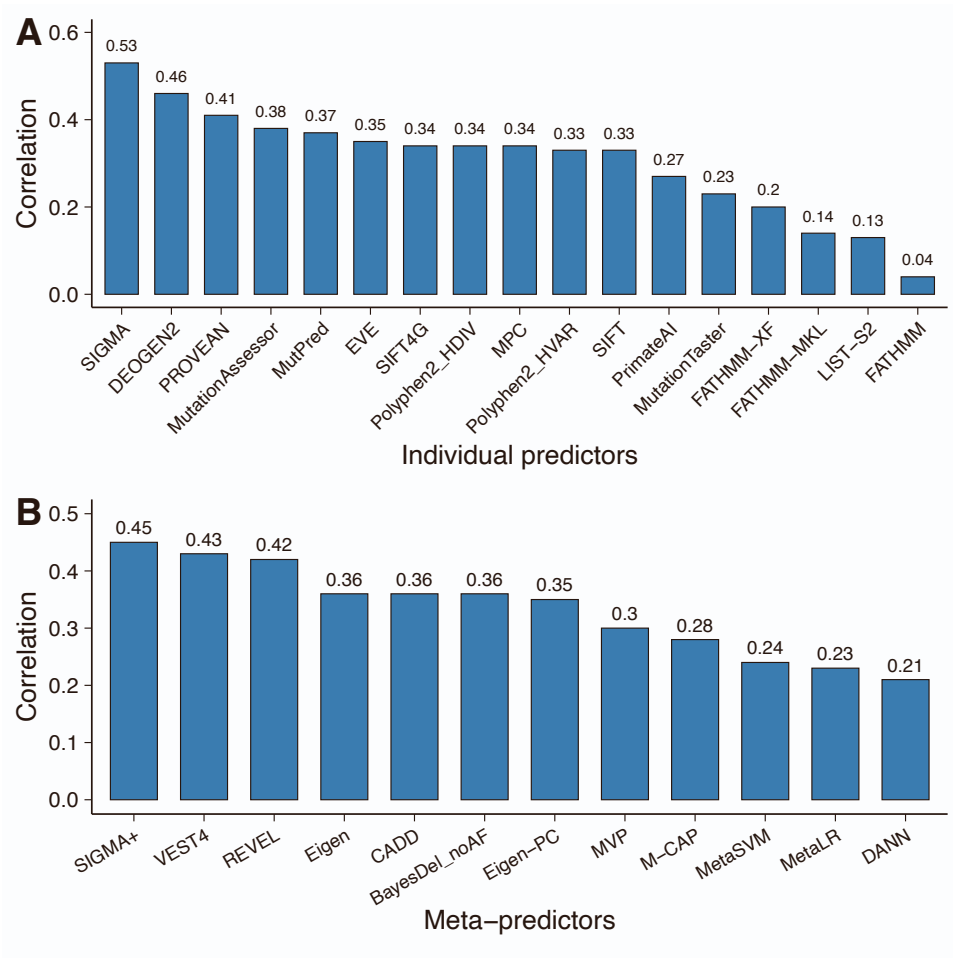

Figure S8: The correlations between the prediction scores and the DMS scores measuring the protein abundance of PTEN. Related to STAR Methods.
